# Supplementary material for: Prediction and clinical utility of a contralateral breast cancer risk model
Source: Breast Cancer Res. 2019 Dec 17;21:144. doi: 10.1186/s13058-019-1221-1 (PMC6918633; doi:10.1186/s13058-019-1221-1)
Supplement: Supplementary file 1 — Additional file 1 Table S1. Data source flowchart. Table S2. Description of the studies included in the analyses. Table S3. Patients and first primary breast cancer characteristics used in the contralateral breast cancer risk prediction model in the complete case and all case analyses. Table S4. Results of multivariable subdistributional hazard model using the complete case dataset. Table S5. List of BCAC studies (including ABCS source) with the corresponding country and geographic area. Table S6. Main patient and disease characteristics. Table S7. Clinical utility of the 5-year contralateral breast cancer risk prediction model. Table S8. Results of multivariable subdistributional hazard model for breast cancer patients without BRCA mutations. Table S9. Clinical utility of the 5-year contralateral breast cancer risk prediction model in non-BRCA tested patients. Table S10. Clinical utility of the 10-year contralateral breast cancer risk prediction model in non-BRCA tested patients. [file 13058_2019_1221_MOESM1_ESM.xlsx]

## Sheet: SupplementaryTable2
Table S2: Description of the studies included in the analyses.
Study name	Australian Breast Cancer Family Study	Amsterdam Breast Cancer Study	Bavarian Breast Cancer Cases and Controls	Breast Cancer Outcome Study of Mutation	Copenhagen General Population Study	Erasmus Medical Center	Helsinki Breast Cancer Study	Karolinska Breast Cancer Study	Karolinska Mammography Project for Risk Prediction of Breast Cancer - Cohort Study	Leuven Multidisciplinary Breast Centre	Mammary Carcinoma Risk Factor Investigation	Multiethnic Cohort	Netherlands Cancer Registry	Leiden University Medical Centre Breast Cancer Study	National Cancer Institute Polish Breast Cancer Study	Karolinska Mammography Project for Risk Prediction of Breast Cancer - Case-Control Study	Prospective Study of Outcomes in Sporadic Versus Hereditary Breast Cancer	Study of Epidemiology and Risk factors in Cancer Heredity	Städtisches Klinikum Karlsruhe Deutsches Krebsforschungszentrum Study	IHCC-Szczecin Breast Cancer Study
Study abbreviation	ABCFS	ABCS	BBCC	BOSOM	CGPS	EMC	HEBCS	KARBAC	KARMA	LMBC	MARIE	MEC	NCR	ORIGO	PBCS	PKARMA	POSH	SEARCH	SKKDKFZS	SZBCS
Country	Australia	Netherlands	Germany	Netherlands	Denmark	Netherlands	Finland	Sweden	Sweden	Belgium	Germany	USA	Netherlands	Netherlands	Poland	Sweden	United Kingdom	United Kingdom	Germany	Poland
Geographic area	US and Australia	Europe - Other	Europe - Other	Netherlands - BOSOM	Europe - Scandinavia	Netherlands - EMC	Europe - Scandinavia	Europe - Scandinavia	Europe - Scandinavia	Europe - Other	Europe - Other	US and Australia	Netherlands - NCR	Europe - Other	Europe - Other	Europe - Scandinavia	Europe - UK	Europe - UK	Europe - Other	Europe - Other
Study design	Population-based case-control study.	Hospital-based consecutive cases; and patients with breast cancer recruited though the clinical genetic center.	Hospital-based cases.	Hospital-based, 10 centers.	Consecutive, incident cases from one hospital with centralized care for a population of 400,000 women from 2001 to present.	Hospital-based.	Hospital-based case-control study, plus additional familial cases .	Population and hospital-based cases; geographically matched controls.	Cohort study.	Hospital-based case-control study.	Population-based case-control study.	Prospective cohort study: nested case-control.	Population-based registry.	Hospital-based prospective cohort study.	Population-based case-control study.	Case-control study .	Prospective cohort.	Population-based case-control study.	Hospital-based breast cancer cohort.	Hospital-based case-control study.
Case definition	All cases diagnosed < age 40 plus a random sample of those diagnosed ages 40-59 from cancer registries in Victoria and New South Wales, plus a limited number diagnosed aged 60-69; cases living in Melbourne recruited from 1992-99 and in Sydney from 1993-98.	Pre-iCOGS: All breast cancer patients (with operable, invasive mammacarcinoma) aged <50 years and diagnosed from 1970-1994 in four Dutch hospitals. iCOGS/OncoArray: Breast cancer patients diagnosed before age 50 in 1995-2011 at the Netherlands Cancer Insitute - Antoni van Leeuwenhoek hospital (NKI-AVL).	Consecutive, unselected cases with invasive breast cancer recruited at the University Breast Centre, Franconia in Northern Bavaria during 1999-2013.	Consecutive, incidence cases from ten hospitals in the Netherlands from 1970 to 2013.	Consecutive, incident cases from 1 hospital with centralized care for a population of 400,000 women from 2001 to the present.	Consecutive, incident cases from one hospital from 1989 to present.	(1) Consecutive cases (883) from the Department of Oncology, Helsinki University Central Hospital 1997-8 and 2000, (2) Consecutive cases (986) from the Department of Surgery, Helsinki University Central Hospital 2001 – 2004, (3) Familial breast cancer patients (536) from the Helsinki University Central Hospital, Departments of Oncology and Clinical Genetics (1995-).	1. Familial cases from Department of Clinical Genetics, Karolinska University Hospital , Stockholm. 2. Consecutive cases from Department of Oncology, Huddinge & Söder Hospital, Stockholm 1998-2000	Inclusion of 70,877 women Oct 2010 - March 2013. 3000 women had BC at cohort entry. In all, 800 women have been diagnosed with breats cancer since study entry (Oct 2015). Approximately 250 women are diagnosed with BC annually.	All patients diagnosed with breast cancer and seen in the Multidisciplinary Breast Center in Leuven (Gashuisberg) since June 2007 plus retrospective collection of cases diagnosed since 2000	Incident cases diagnosed from 2001-2005 in the study region Hamburg in Northern Germany, and from 2002-2005 in the study region Rhein-Neckar-Karlsruhe in Southern Germany.	Incident cases identified from SEER cancer registries in Los Angeles County & State registries in California & Hawaii, USA from 1993-2002.	Consecutive, incident cases of alle primary malignancies; notification from the National Pathology Archive (PALGA), national coverage since 1989 to 2010. We included women diagnosed between 2003 and 2010, a period for which sufficient follow-up and receptor status information.	Consecutive cases diagnosed 1996-2006 in 2 hospitals of South-West Netherlands (Leiden & Rotterdam). No selection for family history; Rotterdam cases selected for diagnosis aged <70. Cases with in situ carcinomas eligible.	Incident cases from 2000-2003 identified through a rapid identification system in participating hospitals covering ~ 90% of all eligible cases, and cancer registries in Warsaw and Łódź covering 100% of all eligible cases.	Incident cases from Jan 2001 – Dec 2008 from the Stockholm/Gotland area. Identified through the Stockholm breast cancer registry.	Cases aged 40 or younger at breast cancer diagnosis. Recruited from breast cancer centre oncology clinics across 126 UK hospitals and diagnosed between January 2000 to December 2007.	Two groups of cases identified through East Anglian Cancer Registry; 1) prevalent cases diagnosed 1991-1996 under 55 years of age at diagnosis, recruited 1996-2002; 2) incident cases diagnosed since 1996 under 70 years of age at diagnosis, recruited 1996-present.	Women diagnosed with primary in situ or invasive breast cancer at the Städtisches Klinikum Karlsruhe from March 1993 to July 2005.	Prospectively ascertained cases of invasive breast cancer patients diagnosed at the Regional Oncology Hospital (Szczecin) in the years 2002, 2003, 2006 and 2007 or the University Hospital from 2002 to 2007 in Szczecin, West-Pomerania, Poland. Patients with pure intraductal or intralobular cancer were excluded (DCIS or LCIS) but patients with DCIS with micro-invasion were included.
Number of patients selected	1326	1979	2642	3760	3463	3390	1603	441	2570	2613	2398	1110	83138	1191	1868	4851	1541	10380	1481	1011
How was follow-up (including vital status) information obtained?	Hospital medical registry and linkage with municipality registry.	Hospital medical registry and linkage with municipality registry.	Cancer registry and Medical records.	The follow-up data were obtained using linkage with the Netherlands Cancer Registry, and from the Medical Registries of the different hospitals and patients records.	Individual patient medical records.	The follow-up (vital status and date of death) was retrieved by the Netherlands Cancer Registry (NCR), who obtain these data through a link with the municipal authorities.	Hospital medical records, cancer registry, population registry.	Medical records.	Through the Swedish Cause of Death register, Clinical Breast Cancer register and the Inpatient register.	Our hospital has an electronic clinical work station (KWS) since over 20 years, in which all clinical data (pathology, treatment, imaging, genetic, etc) at diagnosis and during follow-up are collected.	Vital status was obtained by requesting this information from the population registry.	Linkage to SEER registries, state vital statistics and National Death Index.	The follow-up (vital status and date of death) is retrieved by the IKNL through a link with the municipal authorities.	Linkage to Municipal Population Register; National Pathology Registry; Hospital Information System; General Practitioner.	Complete follow-up for Warsaw cases; only vital status for Łódz cases; we are reviewing medical records plus Cancer Registry data base plus Death Certificates data base.	Through the Swedish Cause of Death register, Clinical Breast Cancer register and the Inpatient register.	National data.	The National Cancer Registration and Analysis Service.	Follow-up (including vital status) information was obtained from medical records, pathology reports or population registries. Risk factor data were collected from about 10% of patients by questionnaire; from the remaining patients risk factor data were obtained from the medical records.	Questionnaire sent by post.
When was the most recent attempt to have complete follow-up?	April 2014	January 2014	December 2013	2013	August 2014	May 2017	Breast cancer specific survival up to 2011; overall survival up to 2015.	2016	We match the data sets to all registers twice a year.	2016-03-01	May 2016	Linkages are performed annually.	2016	2015 for cases from LUMC (N=690); 2007 for cases from DDHK (N=860).	Every 5 years; last data from 2012; currently running follow up after 15 yrs.	We match the data sets to all registers twice a year.	Vital status updated every 6 months.	August 2014	2012 - 2014	About 10 years ago; currently we are sending questionnaire only to all mutation carriers (BRCA1/2, CHEK2, etc).
Other comments	This study is included in the Breast Cancer Association Consortium.	This study is included in the Breast Cancer Association Consortium (BCAC). Patients in this study are also in the Netherlands Cancer Registry (NCR). Since a direct linkage between NCR and this study was not possible, we included both in the analysis because BOSOM contains more detailed information about distant metastasis, contralateral risk-reducing mastectomy, and information of BRCA gene mutat…	This study is included in the Breast Cancer Association Consortium.	Patients in this study are also in the Netherlands Cancer Registry (NCR). Since a direct linkage between NCR and this study was not possible, we included both in the analysis because BOSOM contains more detailed information about distant metastasis, contralateral risk-reducing mastectomy follow-up and information of BRCA gene mutation and family history.	This study is included in the Breast Cancer Association Consortium.	Patients in this study are also in the Netherlands Cancer Registry (NCR). Since a direct linkage between NCR and this study was not possible, we included both in the analysis because EMC contains more detailed information about distant metastasis, contralateral risk-reducing mastectomy, and information of BRCA gene mutation and family history.	Familiar breast cancer patients were excluded from the analyses. This study is included in the Breast Cancer Association Consortium.	This study is included in the Breast Cancer Association Consortium. The set of familiar breast cancer patients was excluded for analyses.	This study is included in the Breast Cancer Association Consortium.	This study is included in the Breast Cancer Association Consortium.	This study is included in the Breast Cancer Association Consortium.	This study is included in the Breast Cancer Association Consortium		This study is included in the Breast Cancer Association Consortium. Patients in this study are also in the Netherlands Cancer Registry (NCR). Since a direct linkage between NCR and this study was not possible, we included both in the analysis because ORIGO contains more detailed information about distant metastasis and information of family history.	This study is included in the Breast Cancer Association Consortium.	This study is included in the Breast Cancer Association Consortium.	This study is included in the Breast Cancer Association Consortium.	This study is included in the Breast Cancer Association Consortium.	SKKDKFZS is in the Breast Cancer Association Consortium.	This study is included in the Breast Cancer Association Consortium.
References	Dite, G.S., et al., Familial risks, early-onset breast cancer, and BRCA1 and BRCA2 germline mutations. J Natl Cancer Inst, 2003. 95(6): p. 448-57.	Schmidt, M.K., et al., Breast cancer survival and tumor characteristics in premenopausal women carrying the CHEK2*1100delC germline mutation. J Clin Oncol, 2007. 25(1): p. 64-9.	Fasching, P.A., et al., Single nucleotide polymorphisms of the aromatase gene (CYP19A1), HER2/neu status, and prognosis in breast cancer patients. Breast Cancer Res Treat, 2008. 112(1): p. 89-98.	van den Broek, A.J., et al., Impact of Age at Primary Breast Cancer on Contralateral Breast Cancer Risk in BRCA1/2 Mutation Carriers. J Clin Oncol, 2016. 34(5): p. 409-18	Weischer, M., et al., Increased risk of breast cancer associated with CHEK2*1100delC. J Clin Oncol, 2007. 25(1): p. 57-63		Fagerholm R,, et al. NAD(P)H:quinone oxidoreductase 1 NQO1*2 genotype (P187S) is a strong prognostic and predictive factor in breast cancer. Nat Genet. 40:844-53, 2008.	Margolin, S., et al., BRCA1 mutations in a population-based study of breast cancer in Stockholm County. Genet Test, 2004. 8(2): p. 127-32.	Skarping, I., et al., Effects of statin use on volumetric mammographic density: results from the KARMA study. BMC Cancer, 2015. 15: p. 435	Neven, P., et al., In early-stage breast cancer, the estrogen receptor interacts with correlation between human epidermal growth factor receptor 2 status and age at diagnosis, tumor grade, and lymph node involvement. J Clin Oncol, 2008. 26(10): p. 1768-9; author reply 1769-71.	Flesch-Janys, D., et al., Risk of different histological types of postmenopausal breast cancer by type and regimen of menopausal hormone therapy. Int J Cancer, 2008. 123(4): p. 933-41	Kolonel, L.N., et al., A multiethnic cohort in Hawaii and Los Angeles: baseline characteristics. Am J Epidemiol, 2000. 151(4): p. 346-57	Font-Gonzalez, A., et al., Inferior survival for young patients with contralateral compared to unilateral breast cancer: a nationwide population-based study in the Netherlands. Breast Cancer Res Treat, 2013. 139(3): p. 811-9	Huijts, P.E., et al., Clinical correlates of low-risk variants in FGFR2, TNRC9, MAP3K1, LSP1 and 8q24 in a Dutch cohort of incident breast cancer cases. Breast Cancer Res, 2007. 9(6): p. R78.	Garcia-Closas, M., et al., Polymorphisms in DNA double-strand break repair genes and risk of breast cancer: two population-based studies in USA and Poland, and meta-analyses. Hum Genet, 2006. 119(4): p. 376-88.		Copson, E.R., et al., Obesity and the outcome of young breast cancer patients in the UK: the POSH study. Ann Oncol, 2015. 26(1): p. 101-12	Mavaddat, N., et al., Familial relative risks for breast cancer by pathological subtype: a population-based cohort study. Breast Cancer Res, 2010. 12(1): p. R10.	Stevens, K.N., et al., Common breast cancer susceptibility loci are associated with triple-negative breast cancer. Cancer Res, 2011. 71(19): p. 6240-9.	Cybulski, C., et al., Clinical outcomes in women with breast cancer and a PALB2 mutation: a prospective cohort analysis. Lancet Oncol, 2015. 16(6): p. 638-44
