# Supplementary material for: Prediction and clinical utility of a contralateral breast cancer risk model
Source: Breast Cancer Res. 2019 Dec 17;21:144. doi: 10.1186/s13058-019-1221-1 (PMC6918633; doi:10.1186/s13058-019-1221-1)
Supplement: Supplementary file 2 — Additional file 2 Figure S1. Graphical assessment of non-linear relationship of age with contralateral breast cancer risk. Figure S2. Visual assessment of calibration through calibration plots in the internal-external cross-validation at 5 years for the contralateral breast cancer risk model with BRCA mutation information. Figure S3. Visual assessment of calibration through calibration plots in the internal-external cross-validation at 10 years for the contralateral breast cancer risk model with BRCA mutation information. Figure S4. Decision curve analysis at 5 years for the contralateral breast cancer risk model including BRCA1/2 mutation information. Figure S5. Results of the leave-one-study-out cross-validation for the contralateral breast cancer risk model at 5 and 10 years without BRCA mutation information. Figure S6. Visual assessment of calibration through calibration plots in the internal-external cross-validation at 5 years for the contralateral breast cancer risk model without BRCA mutation information. Figure S7. Visual assessment of calibration through calibration plots in the internal-external cross-validation at 10 years for the contralateral breast cancer risk model without BRCA mutation information. Figure S8. Density distribution of 10-year predicted absolute risk in patients with no family history and patients with a family history. Figure S9. Decision curve analysis at 5 years for the contralateral breast cancer risk model without BRCA mutation information. Figure S10. Decision curve analysis at 10 years for the contralateral breast cancer risk model without BRCA mutation information. Figure S11. Assessment of inclusion of information of contralateral preventive mastectomy (CPM). [file 13058_2019_1221_MOESM2_ESM.xlsx]

## Sheet: Sheet1
Table S6: Main patient and disease characteristics.
	ABCFS		ABCS		BBCC		BOSOM		CGPS		EMC		HEBCS		KARBAC		KARMA		LMBC		MARIE		MEC		NCR		ORIGO		PBCS		PKARMA		POSH		SEARCH		SKKDKFZS		SZBCS		Overall
	N	%	N	%	N	%	N	%	N	%	N	%	N	%	N	%	N	%	N	%	N	%	N	%	N	%	N	%	N	%	N	%	N	%	N	%	N	%	N	%	N	%
Characteristics of patients and first primary breast cancer	1326	1	1979	1.5	2642	2	3760	2.8	3463	2.6	3390	2.6	1603	1.2	441	0.3	2570	1.9	2613	2	2398	1.8	1110	0.8	83138	62.6	1191	0.9	1868	1.4	4851	3.7	1541	1.2	10380	7.8	1481	1.1	1011	0.8	132756	100
Diagnosis, year
Median (range)	1996 (1990 - 2012)		2007 (2003 - 2013)		2005 (1990 - 2013)		1994 (1990 - 2002)		2006 (1990 - 2012)		2004 (2000 - 2009)		2001 (1996 - 2004)		1999 (1998 - 2000)		2007 (1990 - 2013)		2006 (1990 - 2011)		2003 (2001 - 2005)		1999 (1993 - 2010)		2007 (2003- 2010)		1999 (1991 - 2005)		2001 (1999 - 2003)		2005 (1990 - 2013)		2004 (1999 - 2007)		2002 (1990 - 2008)		2000 (1993 - 2005)		2006 (2001 - 2012)		2006 (1990 - 2013)
Missing	-		-		-		-		-		-		-		-		-		-		-		-		-		-		-		-		-		-		-		-		-
Age, years
Median (range)	44 (23 - 85)		43 (20 - 49)		57 (19 - 95)		44 (19 - 49)		62 (24 - 98)		50 (23 - 60)		56 (22 - 95)		59 (27 - 88)		55 (23 - 85)		55 (22 - 95)		63 (50 - 75)		67 (46 - 90)		59 (19 - 101)		52 (22 - 87)		55 (27 - 75)		59 (25 - 86)		37 (18 - 41)		54 (23 - 88)		60 (21 - 93)		56 (26 - 88)		57 (18 - 101)
Missing	-		-		-		-		-		-		-		-		-		-		-		-		-		-		-		-		-		-		-		-		-
Family history
Yes	203	18.3	399	40.3	306	13.7	737	38.5	373	19.2	591	19.2	375	23.5	70	16.1	-	-	421	19	384	16.5	116	16.4	-	-	163	100	198	10.6	-	-	27	2.2	1344	16	159	100	93	42.7	5959	19.5
No	908	81.7	592	59.7	1932	86.3	1177	61.5	1570	80.8	2482	80.8	1224	76.5	364	83.9	-	-	1791	81	1948	83.5	590	83.6	-	-	0	0	1669	89.4	-	-	1173	97.8	7037	84	0	0	125	57.3	24582	80.5
Missing	215	-	988	-	404	-	1846	-	1520	-	317	-	4	-	7	-	2570	-	401	-	66	-	404	-	83138	-	1028	-	1	-	4851	-	341	-	1999	-	1322	-	793	-	102215	-
BRCA mutation
BRCA 1	43	3.7	39	11.7	0	0	143	4	-	-	54	14.9	5	0.8	3	0.7	-	-	18	11.3	-	-	-	-	-	-	-	-	-	-	-	-	-	-	-	-	6	11.3	22	2.2	333	4.3
BRCA 2	26	2.2	30	9	1	25	61	1.7	-	-	24	6.6	6	1	1	0.2	-	-	15	9.4	-	-	-	-	-	-	-	-	-	-	-	-	-	-	-	-	3	5.7	0	0	167	2.2
Non carrier	1097	94.1	263	79.2	3	75	3343	94.2	-	-	284	78.5	618	98.3	437	99.1	-	-	126	79.2	-	-	-	-	-	-	-	-	-	-	-	-	-	-	-	-	44	83	989	97.8	7204	93.5
Missing	160	-	1647	-	2638	-	213	-	3463	-	3028	-	974	-	-	-	2570	-	2454	-	2398	-	1110	-	83138	-	1191	-	1868	-	4851	-	1541	-	10380	-	1428	-	-	-	125052	-
Nodal status
Positive	463	42.4	586	51.1	783	32.7	1882	50.3	1161	46.9	1481	43.8	700	44.2	117	26.5	541	32.7	1057	42	761	32	259	26.7	32348	39	468	43.2	552	35.8	1328	30.9	702	52.1	2882	35.3	593	44	315	40.8	48979	39.1
Negative	629	57.6	560	48.9	1611	67.3	1862	49.7	1316	53.1	1898	56.2	885	55.8	324	73.5	1115	67.3	1461	58	1618	68	712	73.3	50658	61	616	56.8	992	64.2	2963	69.1	645	47.9	5279	64.7	754	56	458	59.2	76356	60.9
Missing	234	-	833	-	248	-	16	-	986	-	11	-	18	-	-	-	914	-	95	-	19	-	139	-	132	-	107	-	324	-	560	-	194	-	2219	-	134	-	238	-	7421	-
Tumor size, cm
≤ 2	728	70.7	449	39.7	1468	61.8	1431	38.9	1562	61.2	1949	60.1	1012	64.3	314	71.2	1235	73.1	1156	48.7	995	60.9	794	73.9	50252	60.7	654	62.2	918	59.4	3301	75.4	608	45.1	5797	66.9	717	50.1	509	64.7	75849	60.8
(2-5]	271	26.3	536	47.4	814	34.3	1847	50.2	930	36.4	1148	35.4	528	33.5	109	24.7	421	24.9	1012	42.6	571	34.9	245	22.8	28515	34.4	353	33.6	580	37.5	1014	23.2	627	46.5	2638	30.4	653	45.6	263	33.4	43075	34.5
> 5	30	2.9	146	12.9	92	3.9	399	10.9	60	2.4	147	4.5	35	2.2	18	4.1	33	2	208	8.8	68	4.2	36	3.2	4065	4.9	45	4.3	47	3	65	1.5	112	8.3	233	2.7	62	4.3	15	1.9	5916	4.7
Missing	297	-	848	-	268	-	83	-	911	-	146	-	28	-	-	-	881	-	237	-	764	-	35	-	306	-	139	-	323	-	471	-	194	-	1712	-	49	-	224	-	7916	-
TNM stage
I	-	-	593	52.2	1146	54.1	1246	33.5	1003	39.3	1403	41.6	682	42.9	255	57.8	-	-	866	34.9	1094	47.4	661	60.5	39528	47.7	423	40.4	413	36.1	-	-	-	-	4879	51.1	447	33.9	56	48.3	54695	46.8
II	-	-	331	29.1	842	39.8	2152	57.8	1445	56.6	1385	41.4	843	53	147	33.3	-	-	1155	46.5	955	41.4	310	28.4	32035	38.7	541	51.7	699	61.2	-	-	-	-	4291	44.9	616	46.7	41	35.3	47788	40.9
III	-	-	213	18.7	129	6.1	325	8.7	104	4.1	581	17.2	65	4.1	39	8.8	-	-	462	18.6	258	11.2	121	11.1	11239	13.6	83	7.9	31	2.7	-	-	-	-	384	4	255	19.3	19	16.4	14308	12.3
Missing	1326	-	842	-	525	-	37	-	911	-	21	-	13	-	-	-	2570	-	130	-	91	-	18	-	336	-	144	-	725	-	4851	-	1541	-	826	-		-	895	-	15965	-
Tumor grade
I (well differentiated)	-	-	203	12.9053	376	15.004	640	19.8758	733	31.165	604	18.7811	425	27.3488	110	27.8481	321	21.6453	361	14.3653	460	19.4093	304	30.6143	17372	22.8303	156	17.1617	351	20.1377	612	20.0065	112	7.46169	1865	20.859	111	7.58715	155	18.9487	25271	21.6545
II (moderately differentiated)	-	-	677	43.0388	1460	58.2602	1133	35.1863	1161	49.3622	1388	43.1592	681	43.8224	185	46.8354	667	44.9764	1089	43.3347	1279	53.9662	464	46.7271	34108	44.8247	393	43.2343	921	52.8399	1590	51.9778	556	37.042	4408	49.301	854	58.3732	371	45.3545	53385	45.7451
III (poorly/undifferentiated)	-	-	693	44.0559	670	26.7358	1447	44.9379	458	19.4728	1224	38.0597	448	28.8288	100	25.3165	495	33.3783	1063	42.3	631	26.6245	225	22.6586	24612	32.3451	360	39.604	471	27.0224	857	28.0157	833	55.4963	2668	29.8401	498	34.0396	292	35.6968	38045	32.6004
Missing	1326	-	406	-	136	-	540	-	1111	-	174	-	49	-	46	-	1087	-	100	-	28	-	117	-	7046	-	282	-	125	-	1792	-	40	-	1439	-	18	-	193	-	16055	-
ER status
Positive	725	68.5	681	73.9	1917	76	2024	69.3	2580	83.9	2427	74.2	1294	81.7	344	82.9	1477	87.1	2094	84.5	1882	78.7	847	88.4	64790	81.6	735	72.1	1133	65.7	3706	84.6	1120	73.2	6055	82.2	928	63.8	701	73.9	97460	80.5
Negative	334	31.5	240	26.1	605	24	896	30.7	495	16.1	842	25.8	289	18.3	71	17.1	218	12.9	384	15.5	508	21.3	111	11.6	14591	18.4	285	27.9	591	34.3	673	15.4	410	26.8	1308	17.8	527	36.2	247	26.1	23625	19.5
Missing	267	-	1058	-	120	-	840	-	388	-	121	-	20	-	26	-	875	-	135	-	8	-	152	-	3757	-	171	-	144	-	472	-	11	-	3017	-	26	-	63	-	11671	-
HER2 status
Positive	5	20	190	20.9945	335	15.0224	417	24.5873	391	25.4557	389	21.5991	141	15.7366	2	100	176	13.5802	286	12.5825	443	20.0362	33	22.7586	11080	17.3342	53	31.9277	230	17.611	152	12.7303	210	37.4332	487	11.6647	239	20.7465	142	17.7057	15401	17.4433
Negative	20	80	715	79.0055	1895	84.9776	1279	75.4127	1145	74.5443	1412	78.4009	755	84.2634	-	-	1120	86.4198	1987	87.4175	1768	79.9638	112	77.2414	52840	82.6658	113	68.0723	1076	82.389	1042	87.2697	351	62.5668	3688	88.3353	913	79.2535	660	82.2943	72891	82.5567
Missing	1301	-	1074	-	412	-	2064	-	1927	-	1589	-	707	-	439	-	1274	-	340	-	187	-	965	-	19218	-	1025	-	562	-	3657	-	980	-	6205	-	329	-	209	-	44464	-
PR status
Positive	741	70.1	580	63	1523	60.9	1772	61.6	1355	65.9	1804	60.3	1037	65.5	273	75	1210	73.6	1895	76.7	1600	66.9	689	76.7	50586	66	461	60.1	898	52.2	3036	70.5	737	63.4	2708	67.9	680	46.8	175	50.7	73760	65.8
Negative	316	29.9	340	37	976	39.1	1105	38.4	700	34.1	1189	39.7	546	34.4	91	25	434	26.4	575	23.3	790	33.1	209	23.3	26005	34	306	39.9	822	47.8	1271	29.5	425	36.6	1283	32.1	774	53.2	170	49.3	38327	34.2
Missing	269	-	1059	-	143	-	883	-	1408	-	397	-	20	-	77	-	926	-	143	-	8	-	212	-	6547	-	424	-	148	-	544	-	379	-	6389	-	27	-	666	-	20669	-
Morphology
Ductal	1022	77.1	1573	82.7	1887	80.7	2696	74.5	2467	80.4	2802	82.7	1082	68.4	330	75	1099	86.1	1817	71.7	1639	68.5	775	69.9	63977	77	942	85.3	1096	58.7	1033	86.7	814	91.6	7781	75.2	995	67.2	734	73	96561	76.6
Lobular	107	8.1	154	8.1	385	16.5	362	10	374	12.2	281	8.3	336	21.2	58	13.2	151	11.8	258	10.2	517	21.6	116	10.5	9216	11.1	134	12.1	294	15.8	133	11.2	39	4.4	1359	13.1	235	15.9	172	17.1	14681	11.7
Mixed	69	5.2	54	2.8	18	0.8	170	4.7	0	0	118	3.5	62	3.9	7	1.3	21	1.6	286	11.3	89	3.7	84	7.6	3003	3.6	8	0.7	271	14.5	22	1.8	0	0	609	5.9	85	5.7	6	0.6	4982	4
Other	128	9.7	120	6.3	49	2.1	393	10.9	226	7.4	189	5.6	103	6.5	45	10.2	6	0.5	173	6.8	148	6.2	134	12.1	6942	8.3	20	1.8	205	11	4	0.3	36	4	601	5.8	165	11.1	93	9.3	9780	7.8
Missing	-	-	78	-	303	-	139	-	396	-	-	-	20	-	1	-	1293	-	79	-	5	-	1	-	-	-	87	-	2	-	3659	-	652	-	30	-	1	-	6	-	6752	-
Adjuvant chemotherapy
Yes	623	61.6	579	34.7	806	36	1825	51.4	-	-	1868	55.1	613	38.3	110	24.9	704	40.8	978	37.9	1130	47.6	-	-	30066	36.2	439	91.6	791	56.9	1583	34.4	821	72.7	2920	31.9	565	38.1	447	63.5	46868	38.2
No	388	38.4	1090	65.3	1435	64	1723	48.6	-	-	1520	44.9	988	61.7	331	75.1	1020	59.2	1602	62.1	1246	52.4	-	-	53072	63.8	40	8.4	600	43.1	3017	65.6	309	27.3	6231	68.1	916	61.9	257	36.5	75785	61.8
Missing	315	-	310	-	401	-	212	-	3463	-	2	-	2	-	-	-	846	-	33	-	22	-	1110	-	-	-	712	-	477	-	251	-	411	-	1229	-	-	-	307	-	10103	-
Neoadjuvant chemotherapy
Yes	11	1.1	253	15.3	528	77.6	116	4.8	-	-	183	5.4	-	-	7	1.6	58	3.5	159	6.2	87	3.7	-	-	4567	5.5	46	3.9	194	10.4	167	3.8	176	15.6	437	4.8	94	6.3	130	13.5	7213	6
No	1000	98.9	1403	84.7	152	22.4	2285	95.2	-	-	3192	94.6	-	-	434	98.4	1623	96.5	2421	93.8	2289	96.3	-	-	78571	94.5	1144	96.1	1673	89.6	4190	96.2	954	84.4	8714	95.2	1387	93.7	835	86.5	112267	94
Missing	315	-	323	-	1962	-	1359	-	3463	-	15	-	1603	-	-	-	889	-	33	-	22	-	1110	-	-	-	1	-	1	-	494	-	411	-	1229	-	-	-	46	-	13276	-
Adjuvant endocrine therapy
Yes	363	97.8	625	37.4	1385	59.2	809	22.8	-	-	1559	46.1	794	49.6	353	80	1407	81.6	1859	80.7	1866	81.1	-	-	40214	48.4	-	-	767	41.1	3880	84.1	919	81.2	7793	81	994	69	372	71.7	65959	54.1
No	8	2.2	1044	62.6	954	40.8	2739	77.2	-	-	1821	53.9	807	50.4	88	20	317	18.4	444	19.3	434	18.9	-	-	42924	51.6	-	-	1101	58.9	735	15.9	213	18.8	1833	19	446	31	147	28.3	56055	45.9
Missing	955	-	310	-	303	-	212	-	3463	-	10	-	2	-	-	-	846	-	310	-	98	-	1110	-	-	-	1191	-	-	-	236	-	409	-	754	-	41	-	492	-	10742	-
Adjuvant trastuzumab therapy
Yes	-	-	152	9.1	145	6.21784	2	0.31746	-	-	226	6.6706	-	-	-	-	118	8.74074	177	9.16149	48	2.64026	-	-	5675	-	-	-	31	1.65953	108	8.38509	170	15.0442	-	-	6	0.405132	17	26.5625	6875	6.66189
No	1111	100	1517	90.8928	2187	93.7822	628	99.6825	-	-	3162	93.3294	-	-	-	-	1232	91.2593	1755	90.8385	1770	97.3597	-	-	77463	-	-	-	1837	98.3405	1180	91.6149	960	84.9558	-	-	1475	99.5949	47	73.4375	96324	93.3381
Missing	215	-	310	-	310	-		-	3463	-	2	-	1603	-	441	-	1220	-	681	-	580	-	1110	-	-	-	1191	-	-	-	3563	-	411	-	10380	-	-	-	947	-	29557	-
Radiation of the breast
Yes	644	64.3	1394	83.5	194	68.3	2729	72.6	-	-	3258	96.2	1367	85.4	285	64.6	1113	64.3	2117	89.2	1936	81.4	-	-	55876	67.2	847	75.6	650	34.8	3403	73.7	931	82.3	7050	72.3	1160	78.3	75	13.9	85029	69.5
No	357	35.7	276	16.5	90	31.7	1028	27.4	-	-	129	3.8	234	14.6	156	35.4	619	35.7	257	10.8	442	18.6	-	-	27262	32.8	273	24.4	1218	65.2	1213	26.3	200	17.7	2699	27.7	321	21.7	463	86.1	37237	30.5
Missing	325	-	309	-	2358	-	3	-	3463	-	3	-	2	-	-	-	838	-	239	-	20	-	1110	-	-	-	71	-	-	-	235	-	410	-	631	-	-	-	473	-	10490	-
CBC cumulative incidence, %
3-year (95%CI)	1.4 (0.7 - 2.1)		0.6 (0.1 - 1.2)		1.0 (0.5 -1.5)		1.8 (1.3 - 2.2)		0.3 (0.1 - 0.5)		1.7 (1.2 - 2.1)		1.1 (0.6 - 1.6)		1.6 (0.4 - 2.7)		0.5 (0.0 - 1.1)		0.7 (0.3 - 1.0)		1.3 (0.8 - 1.8)		2.1 (0.2 - 4.0)		1.3 (1.3 - 1.4)		2.2 (1.3 - 3.2)		0.5 (0.2 - 0.8)		0.4 (0.0 - 0.8)		0.6 (0.2 - 1.0)		0.5 (0.2 -0.7)		1.2 (0.6 - 1.7)		1.3 (0.4 - 2.1)		1.2 (1.2 - 1.3)
5-year (95%CI)	2.8 (1.8 - 3.8)		1.9 (0.9 - 2.9)		1.2 (0.7 - 1.7)		3.4 (2.8 - 5.1)		0.4 (0.2 - 0.6)		2.6 (2.1 - 3.2)		1.6 (1.0 - 2.2)		3.4 (1.7 - 5.1)		0.5 (0.0 - 1.1)		1.1 (0.5 - 1.6)		1.9 (1.3 - 2.5)		2.6 (0.7 - 4.6)		2.4 (2.3 - 2.5)		3.3 (2.1 - 4.4)		0.6 (0.2 - 0.9)		0.9 (0.4 - 1.4)		0.9 (0.4 - 1.4)		0.7 (0.4 - 0.9)		2.3 (1.5 - 3.1)		1.7 (0.7 - 2.6)		2.1 (2.0 - 2.2)
10-year (95%CI)	4.5 (3.2 - 5.7)		3.2 (1.7 - 4.7)		2.4 (1.5 - 3.3)		5.6 (4.9 - 6.4)		0.7 (0.4 - 1.1)		5.8 (5.0 - 6.6)		2.3 (1.6 - 3.1)		5.5 (3.3 - 7.6)		1.8 (0.7 - 2.9)		3.5 (2.0 - 5.0)		3.7 (2.9 - 4.5)		3.6 (1.6 - 5.7)		4.6 (4.5 - 4.8)		7.3 (5.6 - 9.0)		0.6 (0.3 - 1.0)		2.2 (1.5 - 2.8)		0.9 (0.4 - 1.4)		1.3 (1.0 - 1.6)		4.0 (2.8 - 5.1)		2.5 (0.9 - 4.1)		4.1 (4.0 - 4.3)
Abbreviations: ER: estrogen-receptor PR: progesterone-receptor CBC: contralateral breast cancer CI: confidence interval
